# Supplementary material for: Enhanced lithium storage performance of porous exfoliated carbon fibers via anchored nickel nanoparticles
Source: PubMed Central journal article supplement (PMC9080291; doi:10.1039/c8ra02529k), 2018-05-09
Supplement: RA-008-C8RA02529K-s001.pdf [file RA-008-C8RA02529K-s001.pdf]

## Supplementary Information

### Enhanced Lithium Storage Performance of Porous Exfoliated Carbon Fibers via Anchored Nickel Nanoparticles

Xue Huang,<sup>a</sup> Guiqiang Diao,<sup>c</sup> Siqi Li,<sup>d,e</sup> Muhammad-Sadeeq Balogun,<sup>\*d</sup> Nan Li,<sup>b</sup>  
Yongchao Huang,<sup>b</sup> Zhao-Qing Liu,<sup>\*b</sup> and Yexiang Tong<sup>\*d</sup>

#### Experimental Section

##### Synthesis of the Ni-PCFC.

CFC was purchased from Fuel Cell Earth. All reagents were of analytical grade and were directly used without any purification. Firstly, Ni(OH)<sub>2</sub>.H<sub>2</sub>O nanosheets (denoted as Ni(OH)<sub>2</sub>.H<sub>2</sub>O-CFC) were grown on the CFC as reported in our previous papers. {Balogun, 2016 #1382} Ni(OH)<sub>2</sub>.H<sub>2</sub>O-CFC was then annealed in N<sub>2</sub> atmosphere at 900 °C for 2 h. The furnace was then allowed to cool to room temperature and Ni-PCFC sample was obtained. The Ni-PCFC sample was immersed in conc. HCl overnight to dissolve the Ni nanoparticles and porous PCFC was obtained.

##### Characterization

The morphology, structure, and composition of the electrode materials were characterized by field emission SEM (JSM-6330F) and transmission electron microscope (TEM) (JEM2010-HR, 200 KV). The element identification and heteroatom functional group distribution was measured through X-ray photoelectron spectroscopy (XPS, ESCALab250). The crystallographic information and phase purity of the products were characterized by X-ray diffraction Spectrometry (XRD; Shimadzu X-ray diffractometer 6000, Cu K $\alpha$  radiation, Shimadzu, Tokyo, Japan) and Raman Spectroscopy (Renishaw inVia). Specific surface areas of the samples were calculated from a multipoint Braunauer-Emmett Teller (BET) analysis of the nitrogen adsorption and desorption

isotherms at 77K recorded on an Autosorb-1 apparatus. The content of Ni in Ni-PCFC was determined using inductively coupled plasma mass spectrometry-ICP-MS (Optima 8300, PerkinElmer, USA). The content of C in Ni-PCFC was determined by Elemental Analyzer (Elementar Analysensysteme, GmbH).

### **Electrochemical measurements**

The binder free electrodes (CFC, Ni-PCFC and PCFC) were directly used as anode or working electrode. Pristine carbon cloth (CFC) and Ni-PCFC electrodes were cut into many smaller square pieces with the diameter of area of 1.0 cm<sup>2</sup>. The charge/discharge capacities are calculated in current\*hour per area (i.e. mAh cm<sup>-2</sup>). Half cells were assembled in a coin cell using 1 M LiPF<sub>6</sub> in ethylene carbonate (EC) and diethyl carbonate (DEC) [(1:1)] solution was used as the electrolyte, Celgard 2400 was used as the separator and Li foil as both counter and reference electrodes. The galvanostatic charge/discharge tests were carried out between 0.01–3.0 V vs. Li/Li<sup>+</sup> (anode at different C rates, 1 C=372 mAh/g), on a Neware Battery Testing System (Shenzhen, China).

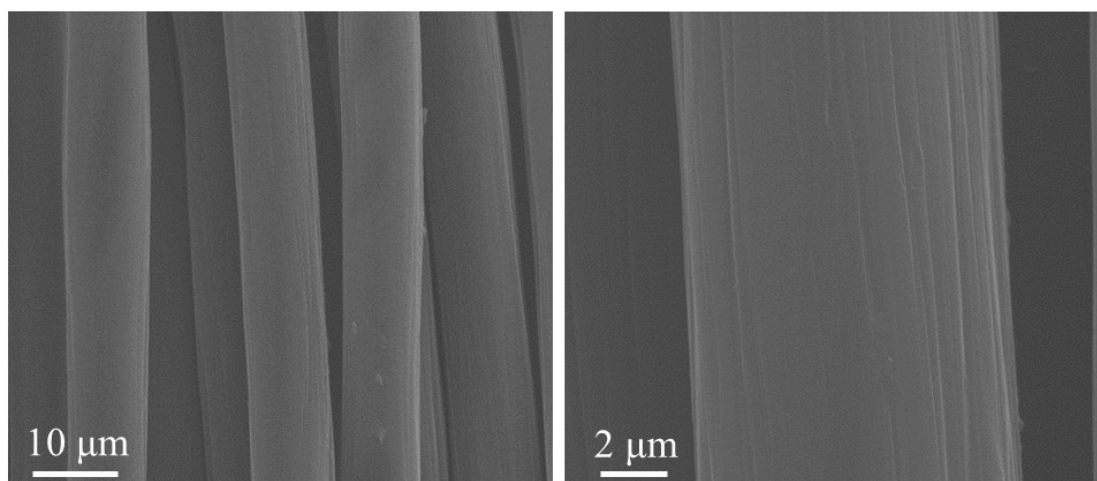

**Figure S1.** SEM images of CFC.

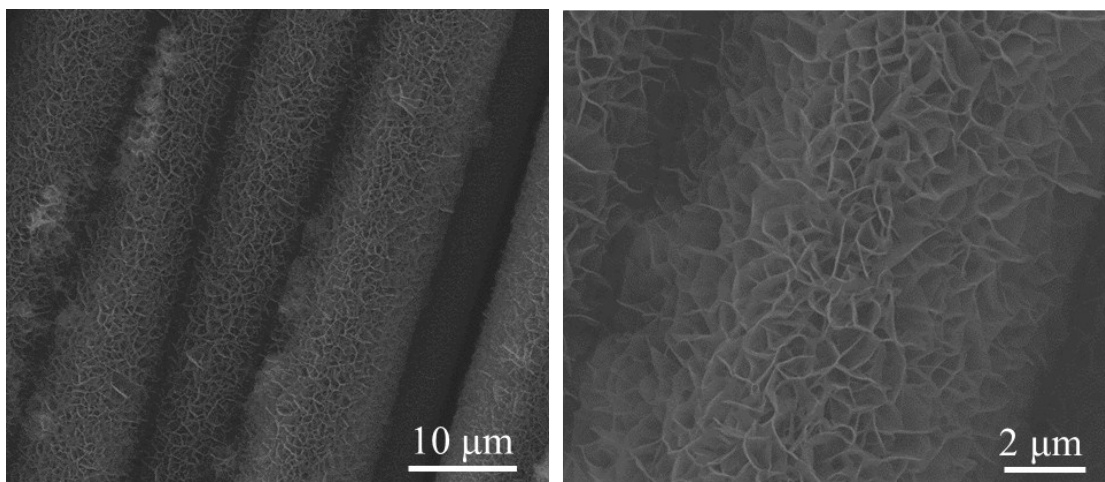

**Figure S2.** SEM images of Ni(OH)<sub>2</sub>·H<sub>2</sub>O-CFC.

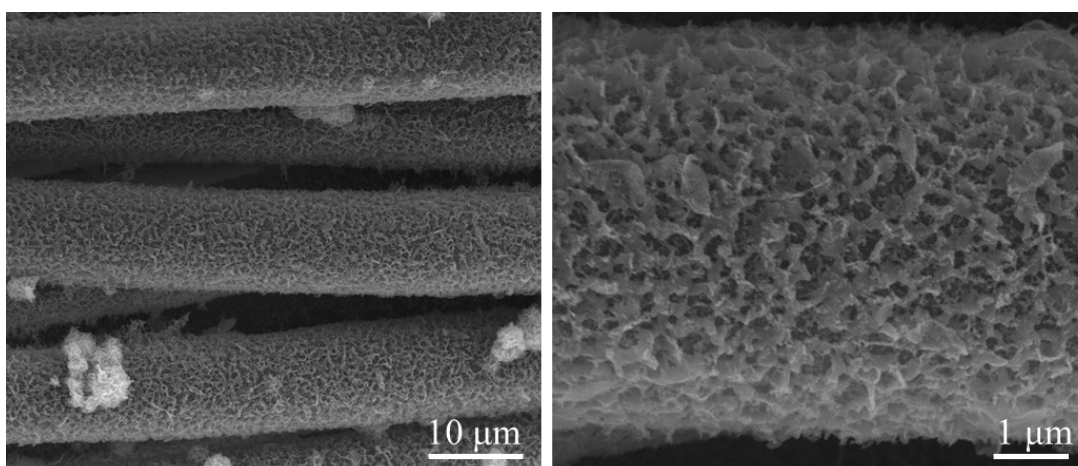

**Figure S3.** SEM images of NiO@Ni-CFC.

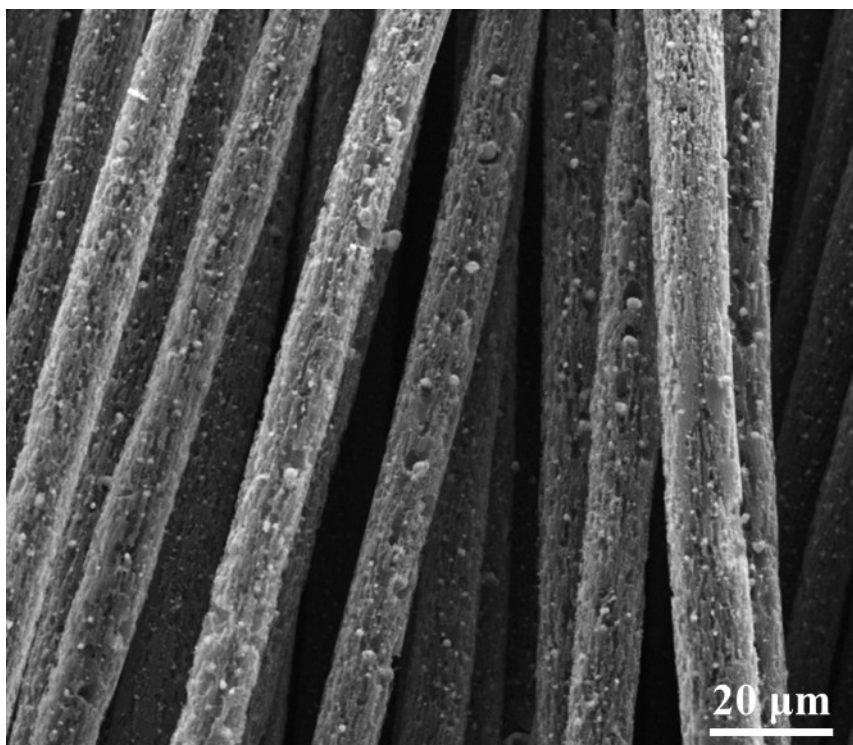

**Figure S4.** Enlarge SEM image of Ni-PCFC.

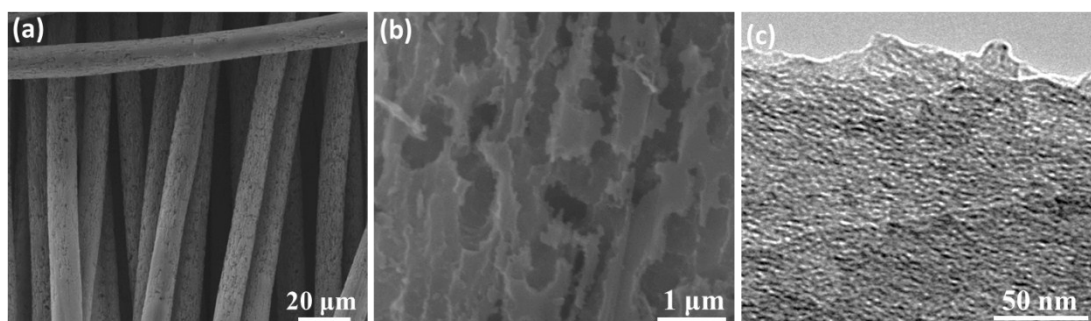

**Figure S4.** Morphological images of PCFC.

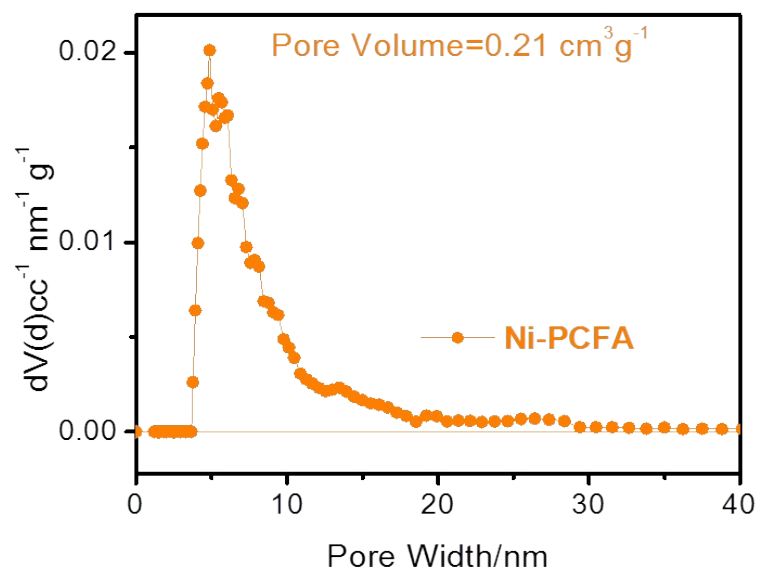

**Figure S6.** Pore-width distribution of Ni-PCFC.

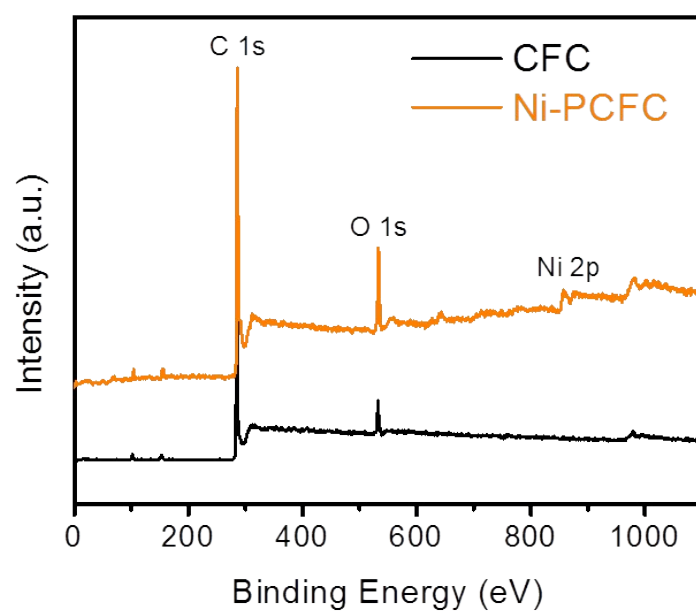

**Figure S7.** XPS survey spectra of the CFC and Ni-PCFC.

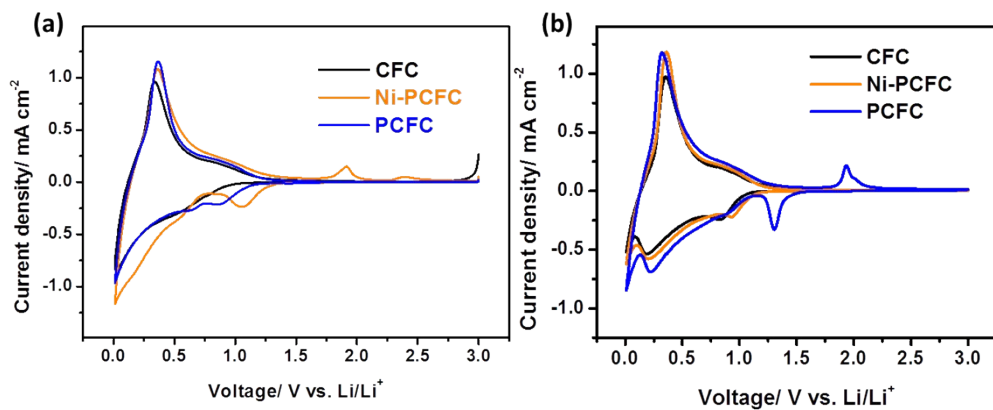

**Figure S8.** 1<sup>st</sup> and 2<sup>nd</sup> CV profile of CFC, Ni-PCFC and PCFC electrodes.

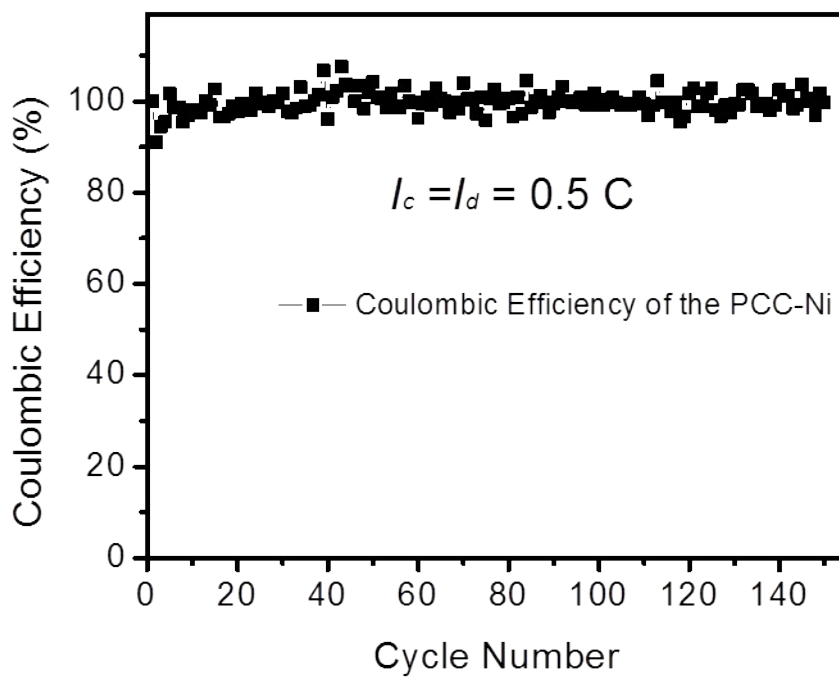

**Figure S9.** Coulombic efficiency of the cyclic stability of Ni-PCFC electrode at 0.5C from Figure 4c.

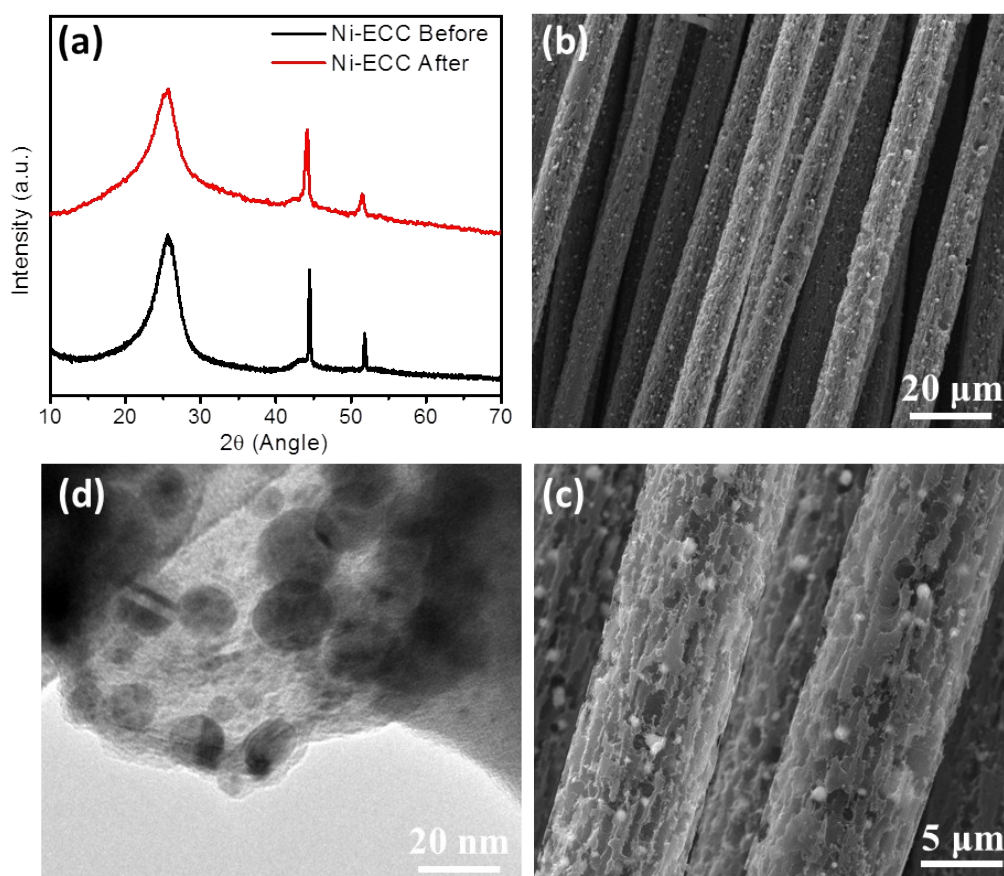

**Figure S10.** (a) XRD pattern of Ni-PCFC before and after electrochemical reaction. (b) Low magnification and (c) magnified SEM images of Ni-PCFC after electrochemical reaction. (d) HRTEM image of Ni-PCFC after electrochemical reaction.
